# Supplementary material for: Can the Norton Scale Score Be Used as an Adjunct Tool for Implantable Defibrillator Patient Selection? A Retrospective Single-Center Cohort Study
Source: MDPI journal article supplement (doi:10.3390/jcm12010214), 2022-12-27
Supplement: s1 [file s1]

## Supplementary Materials

### Supplementary Figures

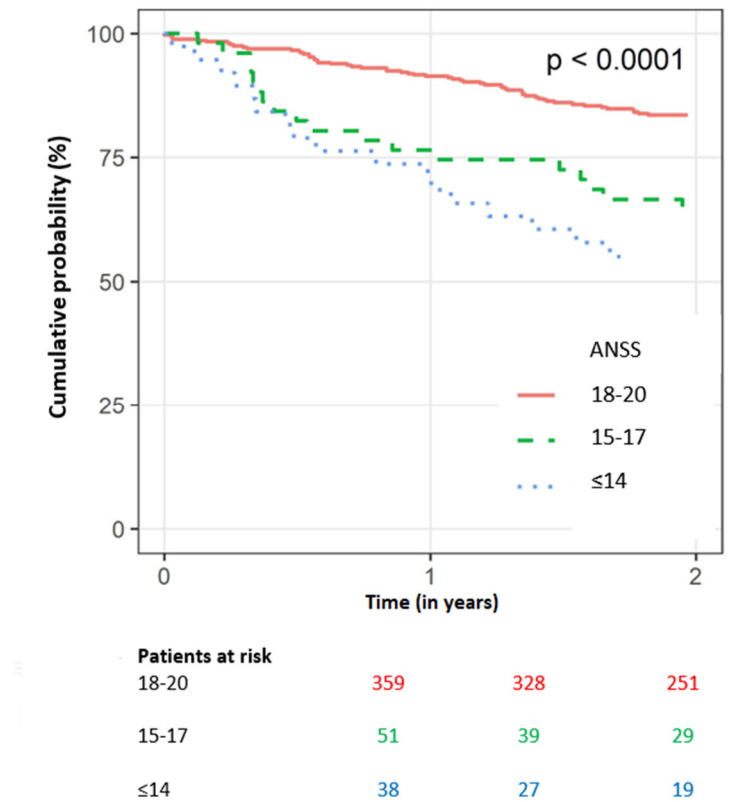

**Supplementary Figure S1.** Kaplan- Meier Survival curve for all-cause mortality for patients with LVEF  $\leq$  35% over time by admission Norton scale score. Numbers reflect patients at risk. p value <0.0001. ANSS= Admission Norton scale score

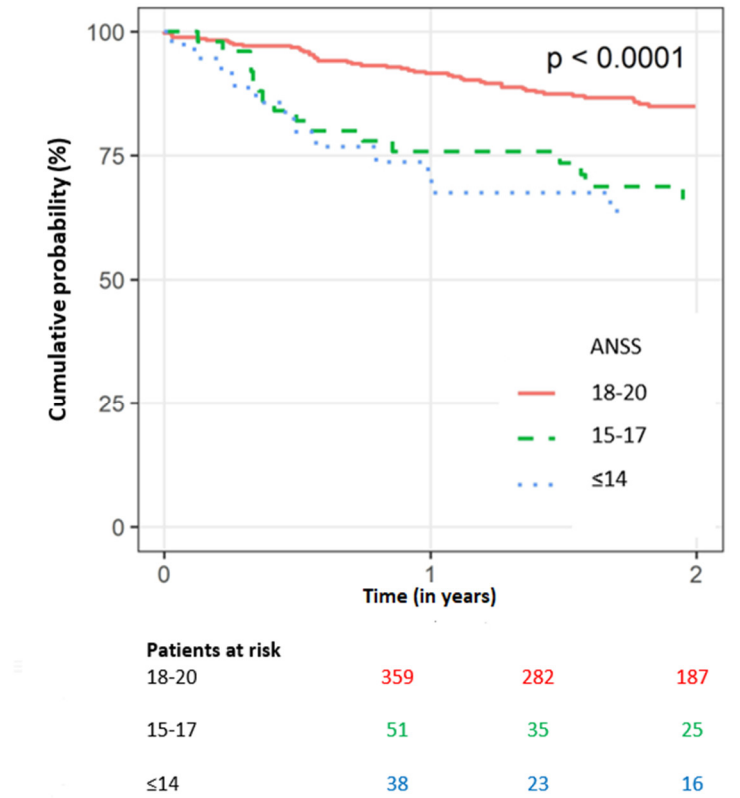

**Supplementary Figure S2.** Kaplan- Meier Survival curve for death without prior defibrillator therapy in patients with LVEF  $\leq 35\%$  over time by admission Norton scale score. Numbers reflect patients at risk. p value  $< 0.0001$ . ANSS= Admission Norton scale score

**Supplementary Figure S3.** Kaplan- Meier Survival curve for all-cause mortality over time in high vs. low clinical risk patients with LVEF  $\leq 35\%$ , by admission Norton scale score. Numbers reflect patients at risk. ANSS= Admission Norton scale score. **(a)** High clinical risk patients:  $\geq 70$  years old and/or baseline serum creatinine values  $\geq 1.5$  mg/dL. p value = 0.00258; **(b)** Low clinical risk patients:  $<70$  years old and baseline serum creatinine values  $<1.5$  mg/dL. p value =0.163.

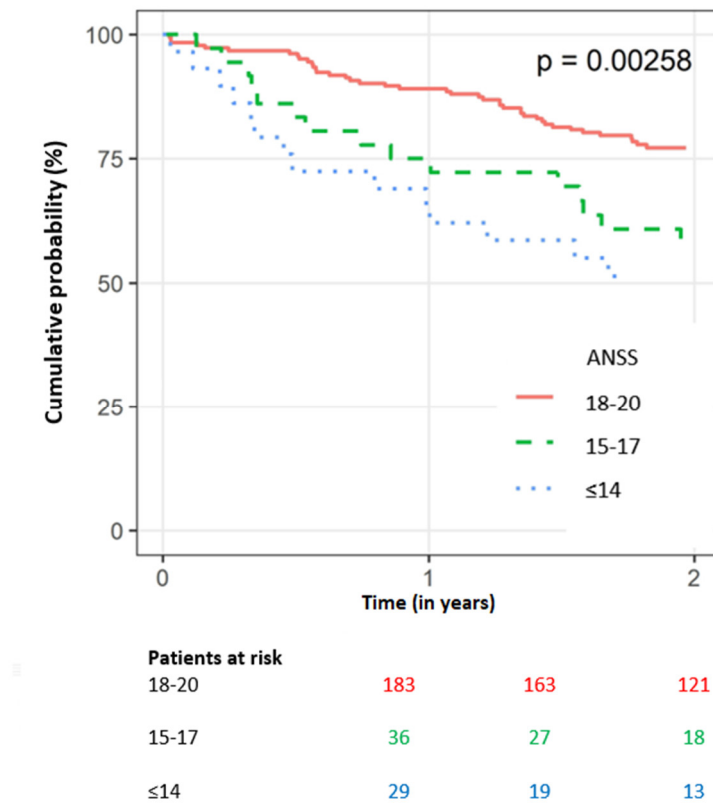

**(a)**

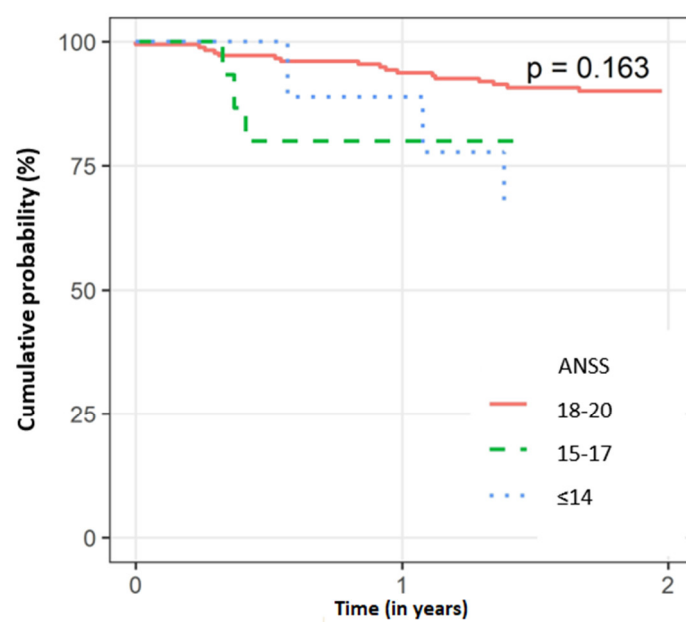

**Patients at risk**

|       |     |     |     |
|-------|-----|-----|-----|
| 18-20 | 176 | 165 | 124 |
| 15-17 | 15  | 12  | 11  |
| ≤14   | 9   | 8   | 6   |

(b)

Supplementary Tables

Table S1.The Norton Pressure Sore Risk-Assessment Scale Scoring System

| Item               | Condition         | Value |
|--------------------|-------------------|-------|
| Physical condition | Good              | 4     |
|                    | Fair              | 3     |
|                    | Poor              | 2     |
|                    | Very bad          | 1     |
| Mental condition   | Alert             | 4     |
|                    | Apathetic         | 3     |
|                    | Confused          | 2     |
|                    | Stuporous         | 1     |
| Activity           | Ambulant          | 4     |
|                    | Walks with help   | 3     |
|                    | Chair bound       | 2     |
|                    | Bedridden         | 1     |
| Mobility           | Full              | 4     |
|                    | Slightly impaired | 3     |
|                    | Very limited      | 2     |
|                    | Immobile          | 1     |
| Incontinence       | None              | 4     |
|                    | Occasional        | 3     |
|                    | Usually urinary   | 2     |
|                    | Urinary and fecal | 1     |

**Table S2.** Routine programming of implantable defibrillators in the Sheba medical center, Tel-Hashomer

| Device                   | Programming                                                                                                                                                                                                                                                                                                                        |
|--------------------------|------------------------------------------------------------------------------------------------------------------------------------------------------------------------------------------------------------------------------------------------------------------------------------------------------------------------------------|
| <b>Biotronik</b>         | VT-zone (188 BPM), detection 36 cycled, redetection 30 cycles, Enhancements onset & stability. ATP X2 Bursts (8 x S1, Decrement: 10 ms, R-S1: 85%, Minimum Interval: 200ms) > Shocks: 8 x 40J<br>VF zone (240 bpm), Detection counter: 25 out of 31 cycles, ATP One Shot: Burst, shocks: 8 x 40J Redetection: 10 out of 14 cycles. |
| <b>Boston scientific</b> | VT zone (170 BPM), Monitor only<br>VF Zone (200 BPM) Duration 2.5 sec, Redetection 1 sec, Shock + Quick convert ATP                                                                                                                                                                                                                |
| <b>SJM-Abbot</b>         | VT Zone (185 BPM) No detection Enhancement. Duration – 6 sec<br>Shock if unstable – On. ATP X2 Initial – 8, Coupling Interval – 88% without decrement, Maximum Shock Energy.                                                                                                                                                       |
| <b>Medtronic</b>         | VT Zone (167 BPM), monitor only (VTNID 32/40), VF Zone (194 BPM) (VFNID 30/40, VFRNID 9/12) allow discrimination of SVT, Shocks 35J X6 +/- FVT Zone (250 BPM) ATPX8: Burst, R-S1 88%, Shocks 35J X6.                                                                                                                               |

**Table S3.** Baseline characteristics of patients with LVEF  $\leq 35\%$  by admission Norton scale score.

| Clinical characteristics             | overall         | ANSS $\leq 14$  | ANSS 15-17    | ANSS 18-20    | p value |
|--------------------------------------|-----------------|-----------------|---------------|---------------|---------|
| Study population                     | n= 448          | n= 38           | n= 51         | n=359         |         |
| Age at procedure (years)<br>$\pm$ SD | 67.8 $\pm$ 11.6 | 72.6 $\pm$ 12.9 | 70 $\pm$ 12.4 | 67 $\pm$ 11.2 | 0.005   |
| Female (%)                           | 62 (14)         | 4 (11)          | 9 (18)        | 49 (14)       | 0.612   |
| Prior myocardial infarction<br>(%)   | 198 (44)        | 15 (40)         | 23 (45)       | 160 (45)      | 0.815   |
| Congestive Heart failure<br>(%)      | 282 (63)        | 28 (73)         | 39 (77)       | 215 (60)      | 0.030   |
| Atrial fibrillation (%)              | 136 (31)        | 12 (32)         | 16 (31)       | 108 (30)      | 0.976   |
| Prior CVA (%)                        | 51 (11)         | 10 (26)         | 11 (22)       | 30 (8)        | <0.001  |
| prior TIA (%)                        | 14 (3)          | 0 (0)           | 1 (2)         | 13 (4)        | 0.415   |
| Dyslipidemia (%)                     | 224 (50)        | 19 (50)         | 23 (45)       | 182 (51)      | 0.734   |
| Currently on Dialysis (%)            | 2 (0.4)         | 1 (3)           | 1 (2.0)       | 0 (0)         | 0.016   |
| Hypertension (%)                     | 246 (55)        | 22 (58)         | 28 (55)       | 196 (55)      | 0.939   |

|                                                  |          |          |          |          |        |
|--------------------------------------------------|----------|----------|----------|----------|--------|
| <b>Diabetes mellitus (%)</b>                     | 167 (37) | 21 (55)  | 25 (49)  | 121 (34) | 0.007  |
| <b>Smoker (%)</b>                                | 115 (26) | 8 (21)   | 14 (28)  | 93 (26)  | 0.767  |
| <b>BMI (kg/m<sup>2</sup>), ±SD</b>               | 27 ±5    | 26 ±4    | 27 ±5    | 27 ±5    | 0.125  |
| <b>GFR MDRD (mL/min/1.73 m<sup>2</sup>), ±SD</b> | 62 (31)  | 63 ±69   | 56 ±24   | 62 ±25   | 0.431  |
| <b>Serum creatinine (mg/dL), ±SD</b>             | 1.3 ±0.6 | 1.4 ±0.6 | 1.4 ±0.7 | 1.3 ±0.5 | 0.220  |
| <b>Hemoglobin (g/dL), ±SD</b>                    | 12 (2)   | 11 ±2    | 12 ±2    | 12 ±2    | <0.001 |
| <b>Serum albumin (g/dL), ±SD</b>                 | 4 ±0.5   | 3 ±0.6   | 4 ±0.5   | 4 ±0.4   | <0.001 |
| <b>LV Ejection fraction (%), ±SD</b>             | 25 ±7    | 27± 7    | 28 ±7    | 26 ±10   | 0.783  |
| <b>ACE inhibitors (%)</b>                        | 322 (72) | 26 (68)  | 33 (65)  | 263 (74) | 0.394  |
| <b>Aldosterone antagonists (%)</b>               | 341 (76) | 28 (74)  | 47 (92)  | 266 (74) | 0.017  |
| <b>Beta blockers (%)</b>                         | 105 (55) | 9 (24)   | 10 (20)  | 86 (24)  | 0.790  |
| <b>Antiarrhythmics:</b>                          |          |          |          |          |        |



|                           |          |         |         |          |       |
|---------------------------|----------|---------|---------|----------|-------|
| <b>Class IB (%)</b>       | 22 (5)   | 2 (5)   | 3 (6)   | 17 (5)   | 0.934 |
| <b>Class IC (%)</b>       | 9 (2)    | 0 (0)   | 1 (2)   | 8 (2)    | 0.648 |
| <b>Class III (%)</b>      | 232 (52) | 22 (58) | 24 (47) | 186 (52) | 0.599 |
| <b>Salicylic acid (%)</b> | 10 (2)   | 0 (0)   | 1 (2)   | 9 (3)    | 0.604 |

<sup>2</sup> Values are mean  $\pm$  standard deviation, median [IQR] or n (%).

<sup>3</sup> ACE= angiotensin-converting enzyme; ANSS= Admission Norton scale score; BMI= body mass index; CVA= Cerebrovascular accident; GFR= glomerular filtration rate; ICD= implantable cardioverter defibrillator; LVEF= left ventricular ejection fraction; MDRD= Modification of Diet in Renal Disease; TIA= transient ischemic attack.
